# Supplementary material for: Outcomes of Noninvasive Positive Pressure Ventilation in Acute Respiratory Distress Syndrome and Their Predictors: A National Cohort
Source: Crit Care Res Pract. 2019 Sep 18;2019:8106145. doi: 10.1155/2019/8106145 (PMC6766679; doi:10.1155/2019/8106145)
Supplement: Supplementary Materials — Table S1: the International Classification of Diseases, Tenth Revision, Clinical Modification and Procedure Coding System (ICD-10 CM/PCS) Codes that were used to identify the dataset records. Table S2: the predicting factors for NIPPV failure. Table S3: the predicting factors for log-transformed length of stay. Table S4: the predicting factors for all-cause in-hospital mortality. [file 8106145.f1.docx]

**Online Supplement**

**Outcomes of Non-invasive Positive Pressure Ventilation in Acute Respiratory Distress Syndrome and Their Predictors: A National Cohort**

Ahmed Taha MD1, Eneko Larumbe-Zabala PhD2, Ashraf Abugroun MD3, Assad Mohammedzein MD 1, M Tarek Naguib MD 1, Manish Patel MD 1,4

1Department of Internal Medicine, Texas Tech University Health Sciences Center, Amarillo, TX, USA

2Clinical Research Institute, Texas Tech University Health Sciences Center, Lubbock, TX, USA

3Department of Internal Medicine, Advocate Illinois Masonic Medical Centre, Chicago, IL, USA

4Department of Internal Medicine, Division of Pulmonary and Critical Care Medicine, Texas Tech University Health Sciences Center, Amarillo, TX, USA

**ORCID:** 0000-0002-8243-2936 (A.T.), 0000-0002-8949-0602 (E.L.Z.), 0000-0003-3552-5635 (M.T.N), 0000-0002-7195-7358 (M.P).

**Table S1. The International Classification of Diseases, Tenth Revision, Clinical Modification and Procedure Coding System (ICD-10 CM/PCS) Codes That Were Used To Identify the Dataset Records.**

| **Procedure** | **ICD-10 PCS code** |
| --- | --- |
|  |  |
| IMV | 0BH17EZ, 0BH18EZ, 5A1935Z, 5A0945Z, 5A0955Z |
| NIPPV | 5A09357, 5A09457, 5A09458, 5A09358, 5A09557, 5A09558 |
|  |  |
| **Diagnosis** | **ICD-10 CM code** |
|  |  |
| ARDS | J80, J810 |
| ACPE | I5021, I5023, I5033, I5031, I5041, I5043 |
| DNR | Z66 |
| **ARDS Etiologies** | |
| Sepsis | A41**, R65** |
| Pneumonia | J12**, J13, J14, J15**, J16**, J17, J18** |
| acute pancreatitis | K85** |
| TRALI | J9584 |
| Trauma | S00**-S99**, T07, T14** |
| Near-drowning | T75.1 |
| **Comorbidities** | |
| COPD | J41*, J42, J43*, J44*, J47* |
| Chronic CHF | I501, I5020, I5022, I5030, I5032, I5040, I5042, I509 |
| Chronic IHD | I25** |
| CKD | N18* |
| ESRD | 5A1D70Z, 5A1D80Z, 5A1D90Z, 3E1M39Z |
| Chronic liver disease | K70**, K71**, K721*, K73**, K74**, K75**, K76**, K77 |
| Malignant neoplasms | C00**-C26**, C30**-C41**, C43**-C58**, C60**-C80**,  C81**-C96** |
| Dementia | F01**, F02**, F03**, G30*, G31*, G32** |
| Hypertension | I10, I11*, I12*, I13**, I15* |
| DM w/wo complication | E10**, E11** |
| Obesity | E66** |
| **Complications** | |
| Shock state | R57**, R65.21, T79.4, T78.2, T78.0, T80.5, T75.4, A48.3, T81.1, 3E030XZ, 3E040XZ |
| Acute kidney failure | N 17** |
| Acute liver failure | K720*, K712 |
| DIC and coagulopathy | D65 |

Definition of abbreviations: *: Numbers 0, 1-9; ARDS: Acute respiratory distress syndrome; IMV: Invasive mechanical ventilation; NIPPV: Noninvasive positive pressure ventilation; ACPE: Acute cardiogenic pulmonary edema; DNR: Do not resuscitate; TRALI: Transfusion-related acute lung injury; COPD: Chronic obstructive pulmonary disease; CHF: Congestive heart failure; IHD: Ischemic heart disease; CKD: Chronic kidney disease; ESRD: End stage renal disease; DM: Diabetes mellitus; DIC: Disseminated intravascular coagulopathy.

**Table S2. Predicting Factors for NIPPV Failure.**

|  | **OR** | **95% CI** | **p-value** | **aOR** | **95% CI** | **p-value** |
| --- | --- | --- | --- | --- | --- | --- |
|  |  |  |  |  |  |  |
| Sepsis | 6.96 | 5.23–9.26 | <0.001 | 4.47 | 3.24–6.17 | **<0.001** |
| Pneumonia | 4.21 | 3.19–5.55 | <0.001 | 2.65 | 1.94–3.62 | <0.001 |
| Acute pancreatitis | 1.25 | 0.52–3.01 | 0.510 |  |  |  |
| TRALI | 7.17 | 0.64–80.05 | 1.600 |  |  |  |
| Trauma | 1.09 | 0.6–1.98 | 0.280 |  |  |  |
| COPD | 1.15 | 0.86–1.54 | 0.970 |  |  |  |
| Chronic CHF | 0.53 | 0.33–0.86 | -2.550 |  |  |  |
| Chronic IHD | 0.54 | 0.39–0.75 | <0.001 | 0.78 | 0.53–1.14 | 0.201 |
| CKD | 0.52 | 0.39–0.7 | <0.001 | 1.08 | 0.76–1.54 | 0.676 |
| CLD | 3.29 | 2.12–5.1 | <0.001 | 2.23 | 1.33–3.75 | **0.003** |
| Neoplasms | 1.20 | 0.77–1.85 | 0.800 |  |  |  |
| Dementia | 0.80 | 0.42–1.53 | -0.680 |  |  |  |
| Hypertension | 0.42 | 0.31–0.57 | <0.001 | 0.59 | 0.41–0.85 | **0.004** |
| Diabetes Mellitus | 0.57 | 0.43–0.76 | <0.001 | 0.73 | 0.53–1.01 | 0.058 |
| Obesity | 0.98 | 0.71–1.36 | -0.110 |  |  |  |
| Smoking | 1.12 | 0.79–1.59 | 0.650 |  |  |  |

Definition of abbreviations: NIPPV: Noninvasive positive pressure ventilation; OR: Unadjusted odds ratios (calculated using simple logistic regression); CI: Confidence interval; aOR: Adjusted odds ratios (calculated using multiple logistic regression); TRALI: Transfusion-related acute lung injury; COPD: Chronic obstructive pulmonary disease; CHF: Congestive heart failure; IHD: Ischemic heart disease; CKD: Chronic kidney disease; CLD: Chronic liver disease.

**Table S3. Predicting Factors for Log-transformed Length of Stay.**

|  | **Coef** | **95% CI** | **p-value** | **Adj Coef** | **95% CI** | **p-value** |
| --- | --- | --- | --- | --- | --- | --- |
| Group  (vs. NIPPV success) |  |  |  |  |  |  |
| IMV | 0.740 | 0.668 – 0.807 | <0.001 | 0.527 | 0.459 – 0.595 | **<0.001** |
| NIPPV Failure | 0.810 | 0.686 – 0.931 | <0.001 | 0.521 | 0.398 – 0.645 | **<0.001** |
| Sepsis | 0.620 | 0.56 – 0.682 | <0.001 | 0.369 | 0.304 – 0.435 | **<0.001** |
| Pneumonia | 0.530 | 0.47 – 0.592 | <0.001 | 0.332 | 0.271 – 0.393 | **<0.001** |
| Acute pancreatitis | 0.540 | 0.392 – 0.693 | <0.001 | 0.427 | 0.27 – 0.585 | **<0.001** |
| TRALI | 0.330 | -0.101 – 0.767 | 0.132 |  |  |  |
| Trauma | 0.330 | 0.219 – 0.435 | <0.001 | 0.314 | 0.213 – 0.414 | **<0.001** |
| COPD | -0.080 | -0.151 – -0.004 | 0.039 | 0.025 | -0.044 – 0.093 | 0.477 |
| Chronic CHF | -0.050 | -0.158 – 0.051 | 0.317 |  |  |  |
| Chronic IHD | -0.220 | -0.293 – -0.149 | <0.001 | -0.045 | -0.113 – 0.023 | 0.191 |
| CKD | -0.250 | -0.321 – -0.182 | <0.001 | -0.059 | -0.126 – 0.008 | 0.085 |
| CLD | 0.310 | 0.208 – 0.415 | <0.001 | 0.173 | 0.07 – 0.276 | **0.001** |
| Neoplasms | 0.200 | 0.097 – 0.312 | <0.001 | 0.139 | 0.036 – 0.243 | **0.008** |
| Dementia | 0.040 | -0.109 – 0.184 | 0.618 |  |  |  |
| Hypertension | -0.190 | -0.265 – -0.121 | <0.001 | 0.034 | -0.037 – 0.105 | 0.350 |
| Diabetes Mellitus | -0.130 | -0.199 – -0.062 | <0.001 | 0.007 | -0.056 – 0.069 | 0.831 |
| Obesity | 0.040 | -0.037 – 0.117 | 0.311 |  |  |  |
| Smoking | -0.100 | -0.179 – -0.021 | 0.014 | -0.119 | -0.193 – -0.044 | **0.002** |

Definition of abbreviations: Coef: Unadjusted coefficients (calculated using simple linear regression); Adj Coef: Adjusted coefficients (calculated using multiple linear regression); CI: Confidence interval; NIPPV: Noninvasive positive pressure ventilation; IMV: Invasive mechanical ventilation; TRALI: Transfusion-related acute lung injury; COPD: Chronic obstructive pulmonary disease; CHF: Congestive heart failure; IHD: Ischemic heart disease; CKD: Chronic kidney disease; CLD: Chronic liver disease.

**Table S4. Predicting Factors for All-cause In-hospital Mortality.**

|  | **OR** | **95% CI** | **p-value** | **aOR** | **95% CI** | **p-value** |
| --- | --- | --- | --- | --- | --- | --- |
| Group (vs. NIPPV success) |  |  |  |  |  |  |
| IMV | 6.48 | 4.88–8.61 | <0.001 | 5.30 | 3.96–7.11 | **<0.001** |
| NIPPV Failure | 7.11 | 4.83–10.48 | <0.001 | 5.43 | 3.61–8.17 | **<0.001** |
| Sepsis | 2.65 | 2.27–3.1 | <0.001 | 2.02 | 1.71–2.4 | **<0.001** |
| Pneumonia | 1.24 | 1.06–1.44 | 0.007 | 0.82 | 0.69–0.97 | **0.023** |
| Acute pancreatitis | 1.01 | 0.66–1.55 | 0.949 |  |  |  |
| TRALI | 0.92 | 0.26–3.2 | 0.894 |  |  |  |
| Trauma | 1.19 | 0.95–1.5 | 0.134 |  |  |  |
| COPD | 0.85 | 0.7–1.02 | 0.087 |  |  |  |
| Chronic CHF | 0.88 | 0.69–1.14 | 0.336 |  |  |  |
| Chronic IHD | 0.96 | 0.8–1.15 | 0.664 |  |  |  |
| CKD | 0.67 | 0.56–0.8 | <0.001 | 0.97 | 0.79–1.19 | **<0.001** |
| CLD | 2.00 | 1.59–2.51 | <0.001 | 1.59 | 1.25–2.04 | **<0.001** |
| Neoplasms | 2.41 | 1.92–3.01 | <0.001 | 2.27 | 1.78–2.89 | **<0.001** |
| Dementia | 1.14 | 0.79–1.63 | 0.495 |  |  |  |
| Hypertension | 0.58 | 0.49–0.68 | <0.001 | 0.82 | 0.68–0.99 | **0.037** |
| Diabetes Mellitus | 0.72 | 0.61–0.85 | <0.001 | 0.91 | 0.76–1.1 | 0.337 |
| Obesity | 0.59 | 0.48–0.73 | <0.001 | 0.69 | 0.55–0.86 | **0.001** |
| Smoking | 0.54 | 0.43–0.67 | <0.001 | 0.52 | 0.41–0.65 | **<0.001** |

Definition of abbreviations: OR: Unadjusted odds ratios (calculated using simple logistic regression; aOR: Adjusted odds ratios (calculated using multiple logistic regression); CI: Confidence interval; NIPPV: Noninvasive positive pressure ventilation; IMV: Invasive mechanical ventilation; TRALI: Transfusion-related acute lung injury; COPD: Chronic obstructive pulmonary disease; CHF: Congestive heart failure; IHD: Ischemic heart disease; CKD: Chronic kidney disease; CLD: Chronic liver disease.
